# Supplementary material
Source: PubMed Central journal article supplement (PMC9795800)
Supplement: mmc1.pdf [file mmc1.pdf]

## Supplementary Materials

### Wastewater Surveillance of SARS-CoV-2 and Chemical Markers in Campus Dormitories in an Evolving Pandemic COVID -19

Sanjeeb Mohapatra<sup>1,2, #</sup>, Sumedha Bhatia<sup>1#</sup>, Kavindra Yohan Kuhatheva Senaratna<sup>1</sup>, Mui-Choo Jong<sup>1</sup>, Chun Min Benjamin Lim<sup>1</sup>, G Reuben Gangesh<sup>1</sup>, Jia Xiong Lee, Goh Shin Giek<sup>1</sup>, Callie Cheung<sup>1,3</sup>, Lin Yutao<sup>1</sup>, You Luhua<sup>1,2</sup>, Ng How Yong<sup>3</sup>, Lim Cheh Peng<sup>4</sup>, Judith Chui Ching Wong<sup>5</sup>, Ng Lee Ching<sup>5,6</sup>, Karina Yew-Hoong Gin<sup>1,2,3\*</sup>

<sup>1</sup>NUS Environmental Research Institute, T-Lab Building, 5A Engineering Drive 1, National University of Singapore, Singapore 117411

<sup>2</sup>Energy and Environmental Sustainability for Megacities (E2S2) Phase II, Campus for Research Excellence and Technological Enterprise (CREATE), 1 CREATE Way, Singapore 138602, Singapore

<sup>3</sup>Department of Civil & Environmental Engineering, National University of Singapore, Engineering Drive 2, Singapore 117576

<sup>4</sup>Office of Risk Management and Compliance, National University of Singapore, Singapore 119077

<sup>5</sup>Environmental Health Institute, National Environment Agency, 11 Biopolis Way, #06-05/08, Singapore 138667

<sup>6</sup>School of Biological Sciences, Nanyang Technological University, 60 Nanyang Drive, Singapore 637551

#Both the authors contributed equally

\*Corresponding author, Tel: +65 6516 8104, email: ceeginyh@nus.edu.sg

**Table S1.** Campus wastewater sampling sites comprising 14 residential facilities, 28 final discharge chambers servicing 9090 students from 89 blocks.

| Site (n=7) | Final discharge ID (n=28) | Number of block (n=89) | Estimated total population (n=9090) |
|------------|---------------------------|------------------------|-------------------------------------|
| A          | A1                        | 2                      | 450                                 |
|            | A2                        | 2                      | 420                                 |
|            | A3                        | 2                      | 470                                 |
|            | A4                        | 2                      | 460                                 |
|            | A5_n                      | 3                      | 450                                 |
|            | A5_s                      | 3                      | 510                                 |
|            | A6_a                      | 1                      | 300                                 |
|            | A6_b                      | 1                      |                                     |
|            | A6_c                      | 1                      |                                     |
|            | A6_d                      | 1                      |                                     |
|            | A6_e                      | 1                      |                                     |
|            | A6_f                      | 1                      |                                     |
|            | A6_g                      | 1                      |                                     |
|            | A6_h                      | 1                      |                                     |
| B          | B1                        | 6                      | 485                                 |
| C          | C1                        | 5                      | 650                                 |
| D          | D1                        | 6                      | 490                                 |
|            | D2                        | 6                      | 470                                 |
| E          | E1                        | 6                      | 510                                 |
|            | E2                        | 6                      | 520                                 |
| F          | F1                        | 8                      | 400                                 |
| G          | G1_a                      | 4                      | 350                                 |
|            | G1_b                      | 4                      | 555                                 |
|            | G1_c                      | 1                      | 90                                  |
|            | G1_d                      | 2                      | 210                                 |
|            | G1_e                      | 3                      | 300                                 |
|            | G1_f                      | 5                      | 470                                 |
|            | G1_g                      | 5                      | 530                                 |

**Table S2.** Primer/Probe sets and PCR conditions used in this study.

| Primer/Probe          | Sequence                           | Number of cycles | Annealing temperature (°C) | Reference |
|-----------------------|------------------------------------|------------------|----------------------------|-----------|
| SARS-CoV-2_N1-Forward | 5'-GACCCCAAAATCAGCGAAAT-3'         | 45               | 55                         | 1,2,3     |
| SARS-CoV-2_N1-Reverse | 5'-TCTGGTTACTGCCAGTTGAATCTG-3'     |                  |                            |           |
| SARS-CoV-2_N1_Probe   | 5'-ACCCCGCATTACGTTTGGTGGACC-FAM-3' |                  |                            |           |
| PMMoV FP1 - Forward   | 5'-GAGTGGTTTGACCTTAACGTTGA-3'      | 45               | 55                         | 4         |
| PMMoV-RP1 - Reverse   | 5'-TTGTCGGTTGCAATGCAAGT-3'         |                  |                            |           |
| PMMoV-Probe           | 5'-CCTACCGAAGCAAATG-FAM-3'         |                  |                            |           |

## References

1. Hirotsu, Y., Mochizuki, H., Omata, M., 2020. Double-Quencher Probes Improved the Detection Sensitivity of Severe Acute Respiratory Syndrome Coronavirus 2 (SARS-CoV-2) by One-Step RTPCR. medRxiv 2020.03.17.20037903.
2. Jung, Y.J., Park, G.-S., Moon, J.H., Ku, K., Beak, S.-H., Kim, S., Park, E.C., Park, D., Lee, J.-H., Byeon, C.W., Lee, J.J., Maeng, J.-S., Kim, S.J., Kim, S.I., Kim, B.-T., Lee, M.J., Kim, H.G., 2020. Comparative analysis of primer-probe sets for the laboratory confirmation of SARS-CoV-2. bioRxiv 2020.02.25.964775. <https://doi.org/10.1101/2020.02.25.964775>
3. <https://www.cdc.gov/coronavirus/2019-ncov/lab/rt-pcr-panel-primer-probes.html>
4. Zhang T, Breitbart M, Lee WH, Rum JQ, Wei CL, Soh SW, Hibberd ML, Liu ET, Rohwer F, Ruan Y. 2006. RNA viral community in human feces: prevalence of plant pathogenic viruses. PLoS Biol. 4:e3.10.1371/journal.pbio.0040003

**Table S3. List of target emerging contaminants, MS transition and surrogate isotope-labelled standards.**

| Name                              | Abbreviation | Transition     | Surrogate isotope-labelled standards |
|-----------------------------------|--------------|----------------|--------------------------------------|
| Acetaminophen                     | ACT          | 152.1 -> 110.1 | ACT-D4                               |
| Azithromycin                      | AZT          | 749.5 -> 158.0 | AZT-D3                               |
| Benzethonium Cl                   | BCL          | 413.3 -> 91.0  | Nevirapine-d3                        |
| Benzyltrimethylammonium chloride  | BAC-12       | 305.0 -> 58.1  | CF-D9                                |
| Caffeine                          | CF           | 195.1 -> 138.1 | CF-D9                                |
| Clarithromycin                    | CLAR         | 748.5 -> 158.2 | CLAR-D3                              |
| Clindamycin                       | CLI          | 425.2 -> 126.0 | CLAR-D3                              |
| Chlortetracycline                 | CTC          | 479.1 -> 444.1 | TET-D6                               |
| Didecyltrimethylammonium chloride | DADMAC-10    | 327.4 -> 43.2  | TMP-D3                               |
| Doxycycline                       | DXC          | 446.2 -> 429.1 | ACT-D4                               |
| Erythromycin-H <sub>2</sub> O     | ERY-H20      | 716.5 -> 158.0 | ERY-D6                               |
| Lincomycin                        | LIN          | 407.2 -> 126.2 | LIN-D3                               |
| Oxybenzone                        | OXB          | 229.1 -> 151.1 | DEET-D10                             |
| Oxytetracycline                   | OXY          | 461.1 -> 426.1 | TET-D6                               |
| Sulpiride                         | SUL          | 342.2 -> 112.2 | CBZ-D8                               |
| Triclocarban                      | TCC          | 313.0 -> 160.0 | TCC-13C6                             |
| Triclosan                         | TCS          | 286.9 -> 35.0  | TCS-D3                               |
| Tetracycline                      | TET          | 445.2 -> 410.3 | TET-D6                               |
| Tylosin                           | TYL          | 916.5 -> 174.0 | AZT-D3                               |

**Table S4 Quality control data of the targets.**

| Target analytes      | MDL (ng/L) | MQL (ng/L) | RR±SD (%) |
|----------------------|------------|------------|-----------|
| ACT                  | 2          | 9          | 101.7±4.4 |
| AZT                  | 0.15       | 0.5        | 107.3±8.9 |
| BCL                  | 2          | 9          | 85±19     |
| BAC-12               | 2          | 9          | 78±12     |
| CF                   | 2.5        | 8          | 100.9±4.7 |
| CLAR                 | 0.15       | 0.5        | 97.6±5    |
| CLI                  | 0.1        | 0.3        | 101±4.8   |
| CTC                  | 2.5        | 7.5        | 101.1±2.5 |
| DADMAC-10            | 2          | 9          | 79±8.9    |
| DXC                  | 2          | 5          | 105.8±4.8 |
| ERY-H <sub>2</sub> O | 0.2        | 0.6        | 94.2±10.5 |
| LIN                  | 0.1        | 0.3        | 99±5.5    |
| OXB                  | 0.08       | 0.25       | 96.9±1.6  |
| OXY                  | 23         | 75         | 103.6±9.4 |
| SUL                  | 0.06       | 0.2        | 94.1±4.4  |
| TCC                  | 1.4        | 4.5        | 102.9±4.4 |

|     |     |     |          |
|-----|-----|-----|----------|
| TCS | 3   | 10  | 98.9±6.7 |
| TET | 15  | 50  | 104.1±1  |
| TYL | 0.5 | 1.5 | 87.7±3.4 |

RR: Relative recovery (RR) of individual analytes were performed on the wastewater samples (200 mL) spiked with 50 ng/L target analytes before and after the solid phase extraction (SPE), and then calculated using relative response with a corresponding labeled internal standard.

$$\%RR = \frac{C_{pre-s} - C_N}{C_{sp-sol}} \times 100$$

Where  $C_{pre-s}$  is the measured concentration of the analyte in the sample extract and the samples were spiked with the analytes and surrogate standards prior to the extraction,  $C_N$  is the measured concentration of the analyte in the corresponding sample extracts without spiking,  $C_{sp-sol}$  is the measured concentration of the analyte in the spiking solution.

MDL and MQL: Method detection limit (MDL) and method quantification limit (MQL) were defined to be the lowest observable concentration of analytes in spiked extracts of the samples giving a signal-to- noise (S/N) of 3 and 10, respectively.

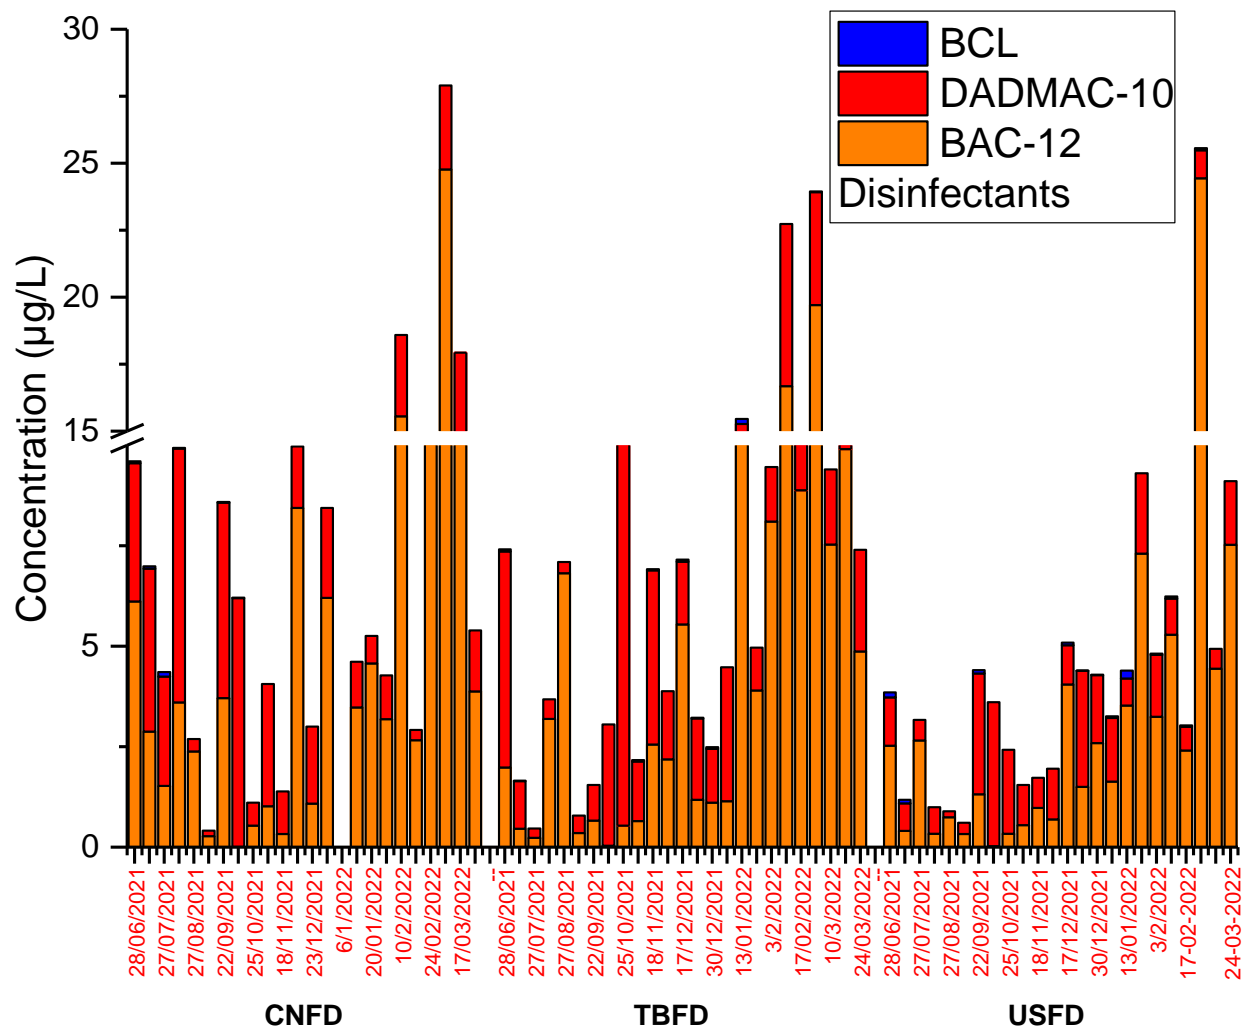

**Figure S1. Variations in the concentrations of disinfectants**

CNFD, TBFD and USFD can be read as A2, A4 and A5, respectively.

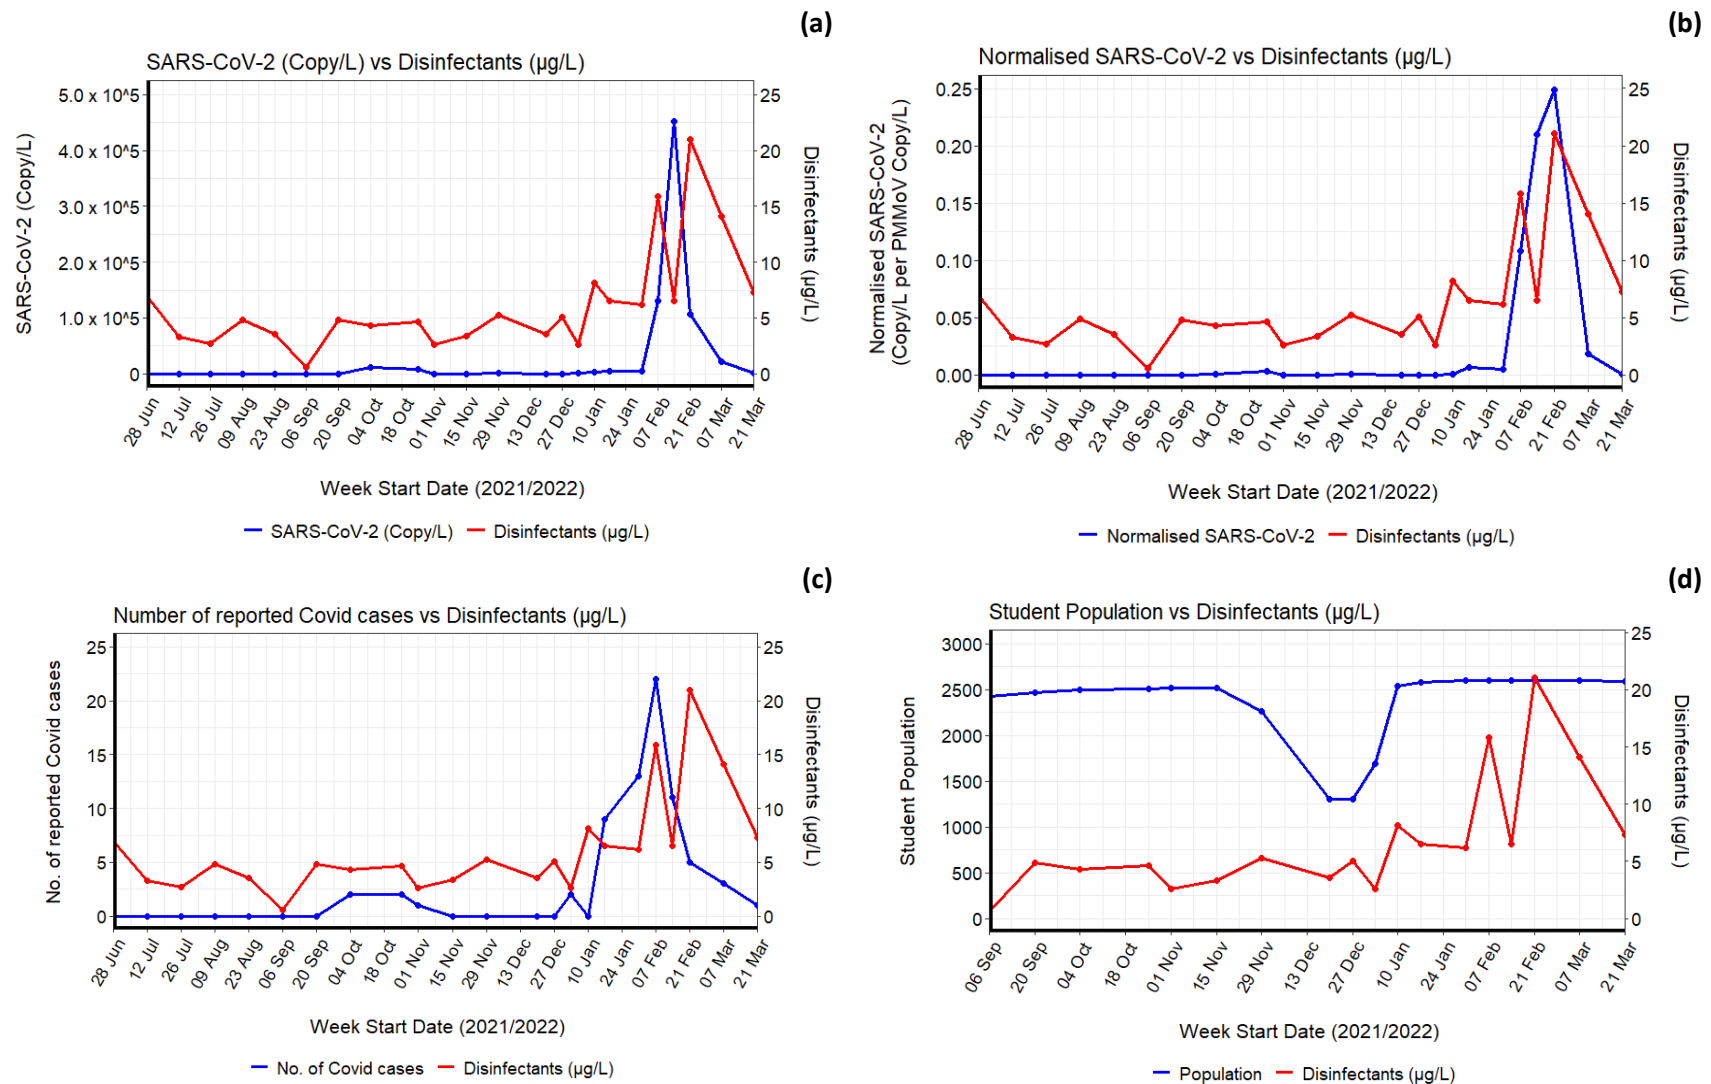

**Figure S2.** Correlation analysis between disinfectants and (a) SARS-CoV-2 (copy/L), (b) normalized SARS-CoV-2 (Copy/L per PMMoV Copy/L), (c) number of reported COVID-19 cases, (d) student population

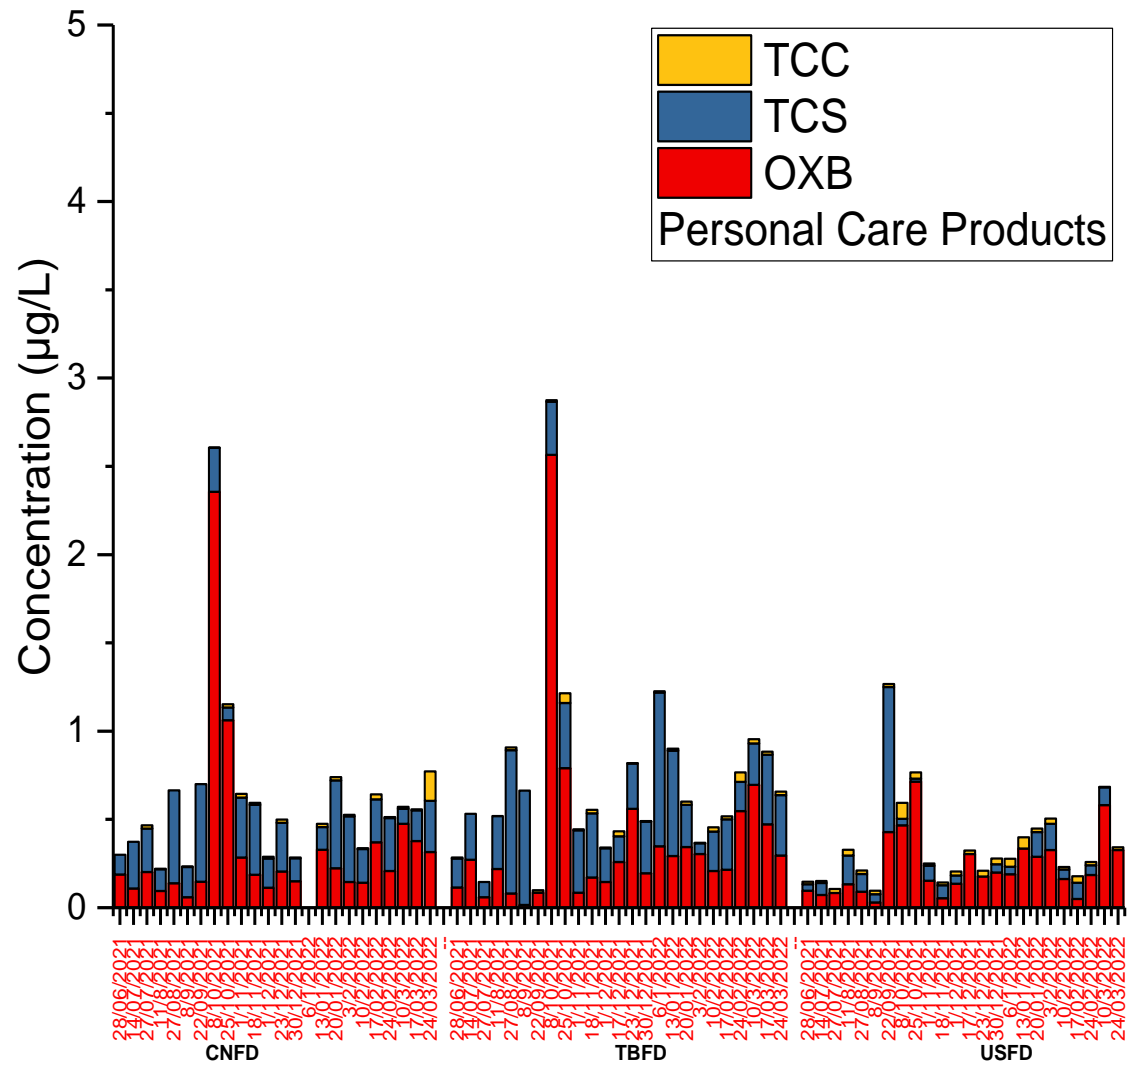

Figure S3. Variations in the concentrations of personal care products



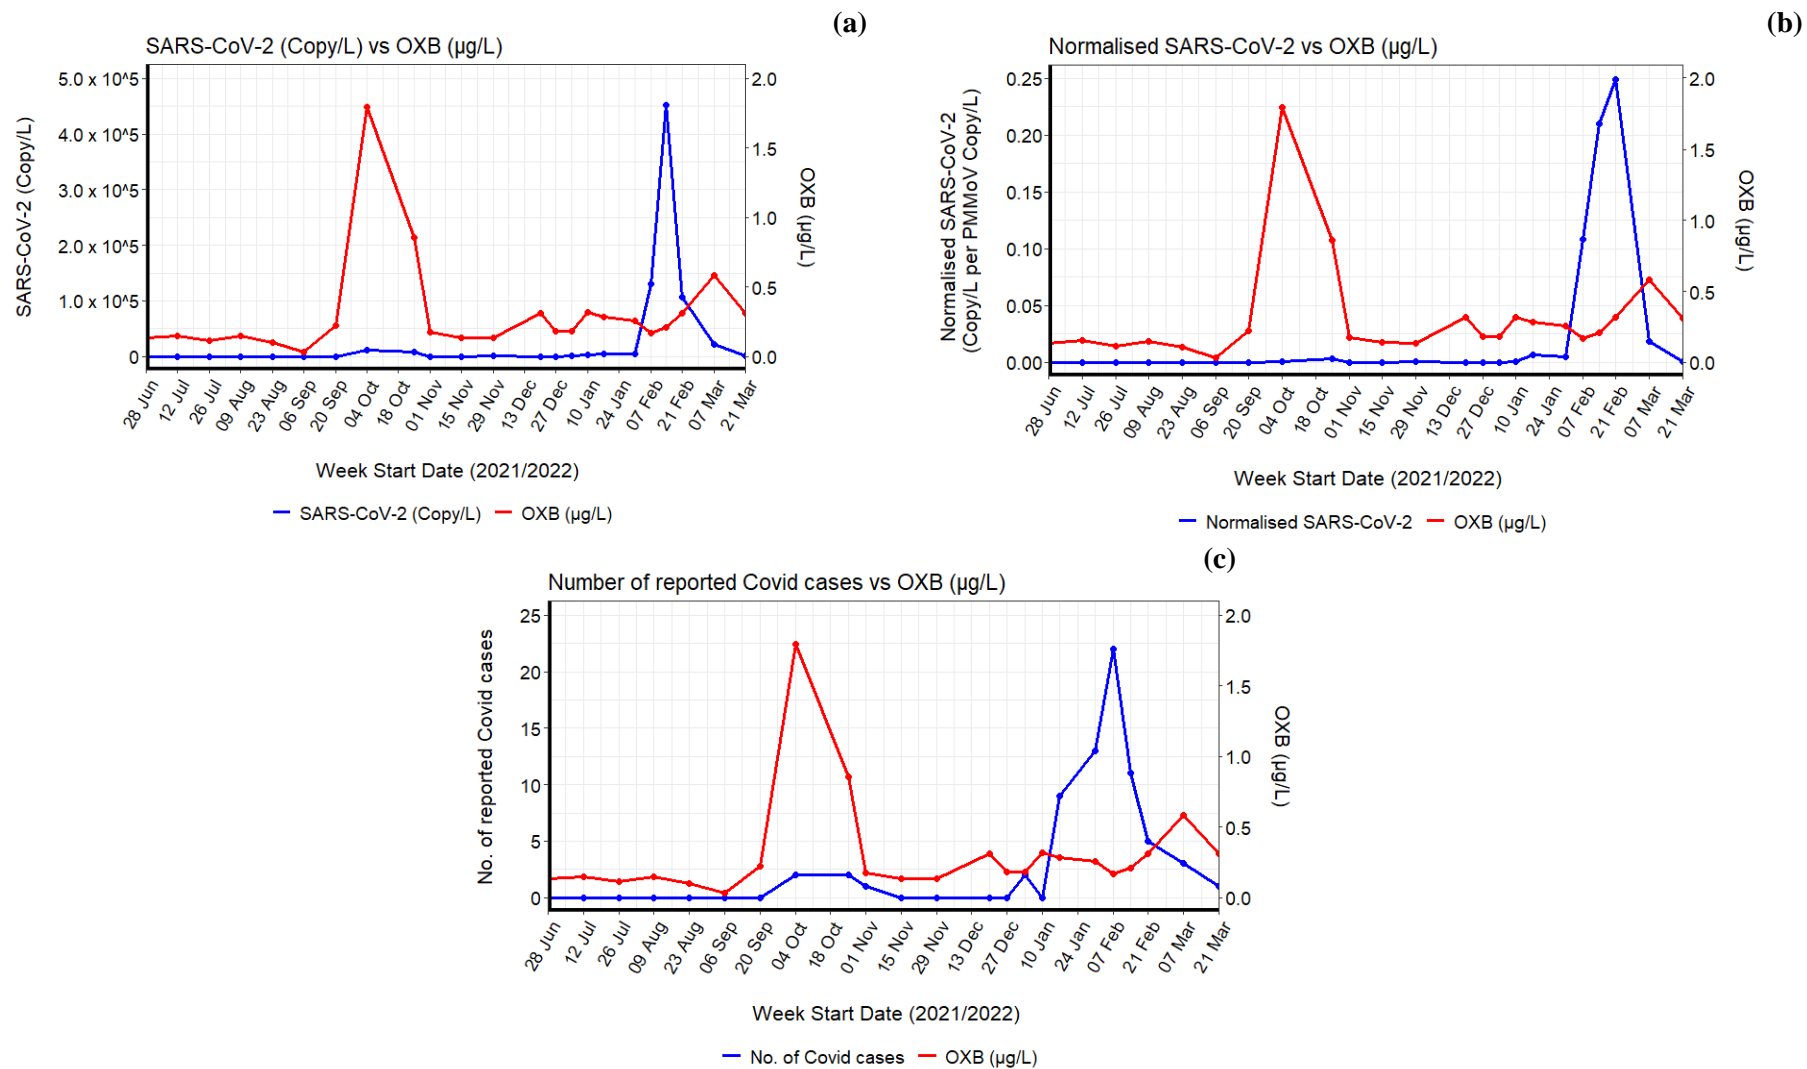

**Fig. S4.** Correlation analysis between OXB and (a) SARS-CoV-2 (copy/L), (b) normalized SARS-CoV-2 (Copy/L per PMMoV Copy/L), (c) number of reported COVID-19 cases

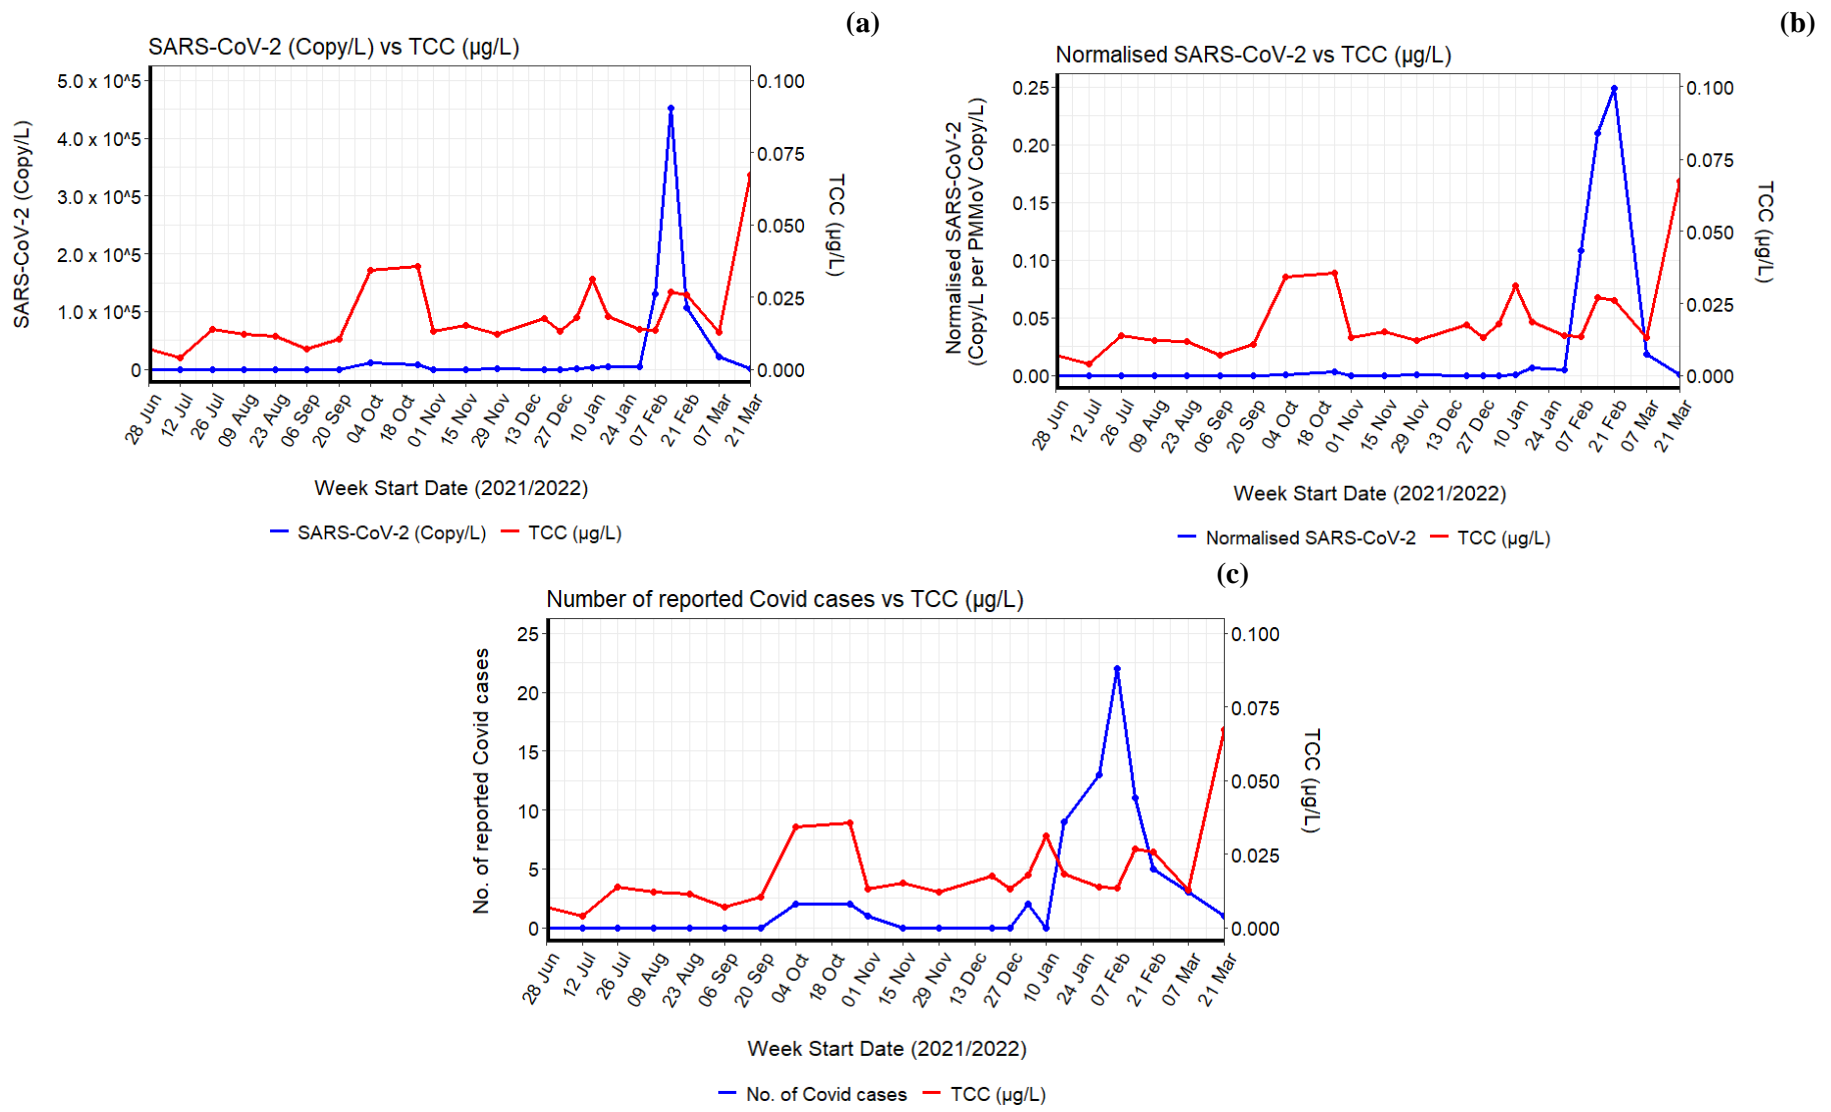

**Fig. S5.** Correlation analysis between TCC and (a) SARS-CoV-2 (copy/L), (b) normalized SARS-CoV-2 (Copy/L per PMMoV Copy/L), (c) number of reported COVID-19 cases

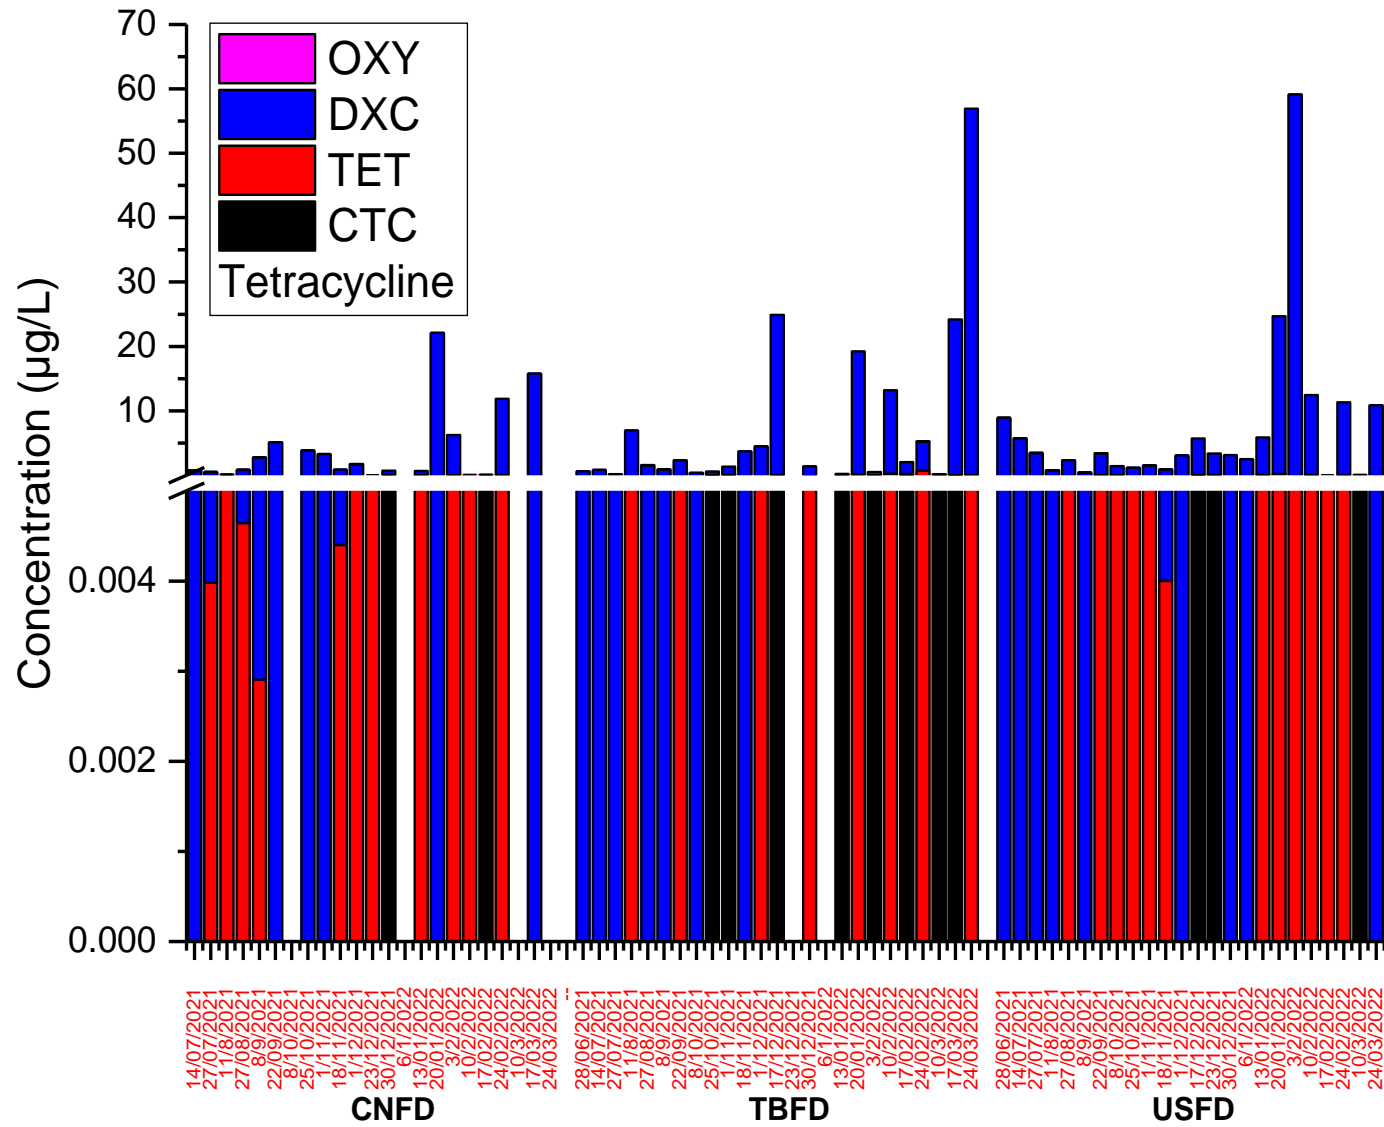

Figure S6. Variations in the concentrations of antibiotics- tetracycline

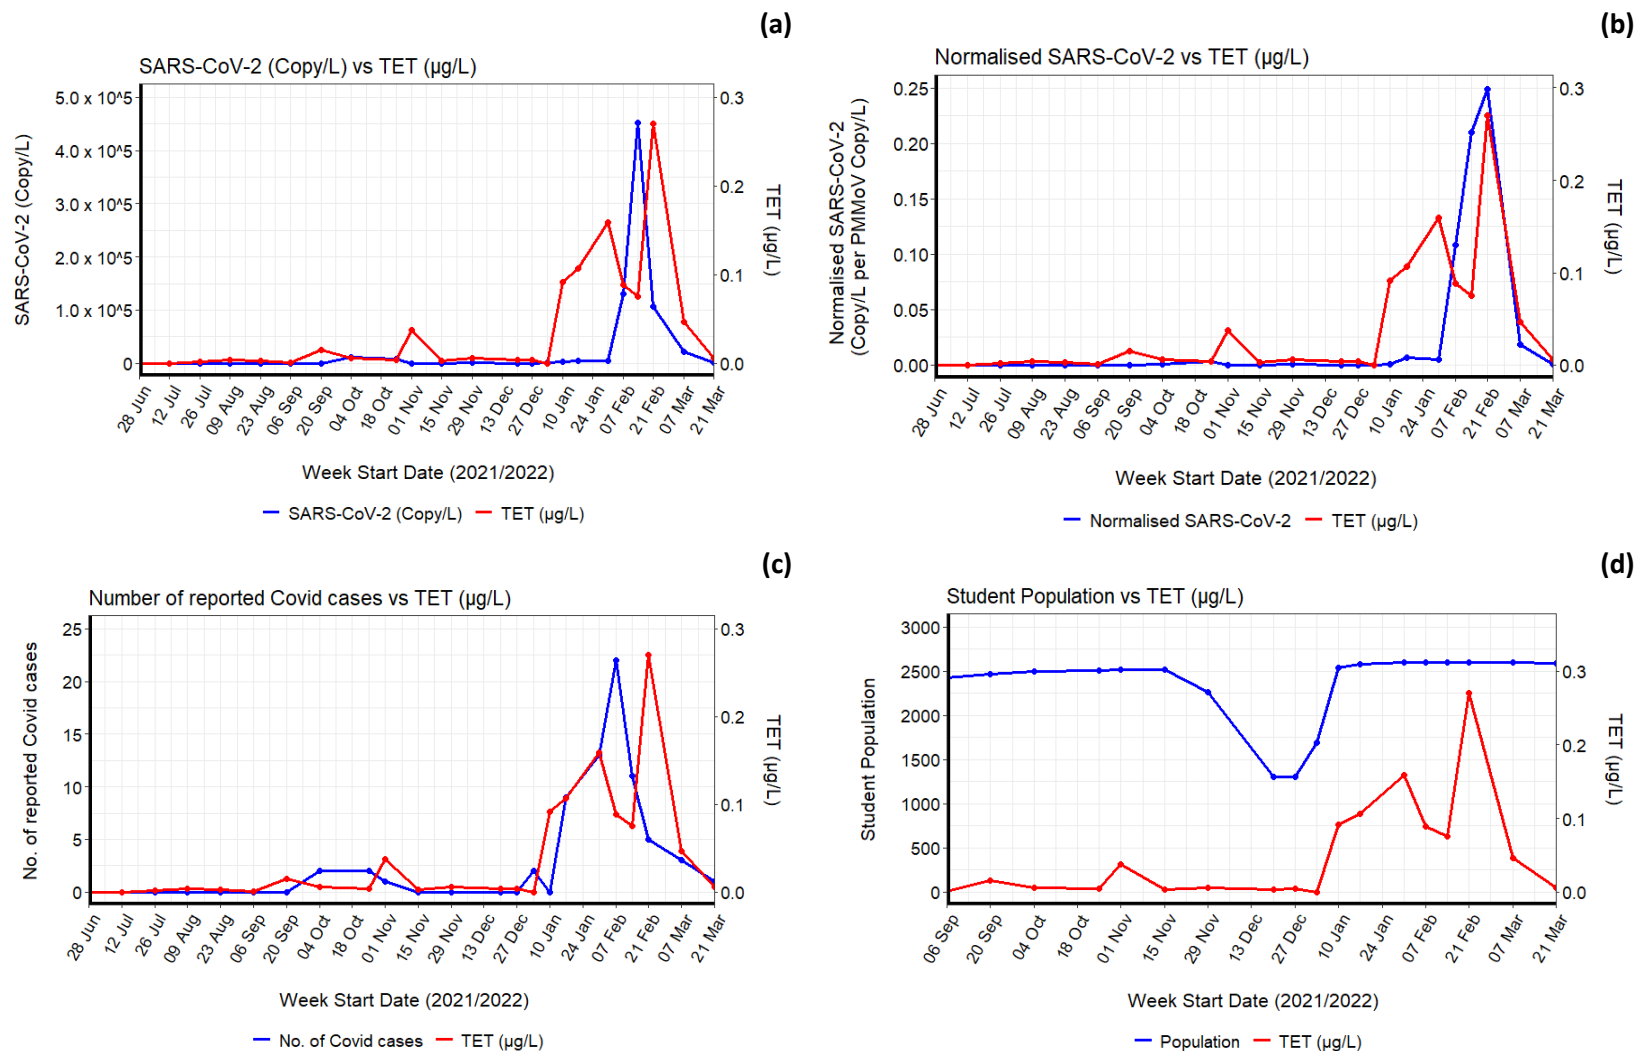

**Figure S7.** Correlation analysis between tetracyclines and (a) SARS-CoV-2 (copy/L), (b) normalized SARS-CoV-2 (Copy/L per PMMoV Copy/L), (c) number of reported COVID-19 cases, and (d) student population

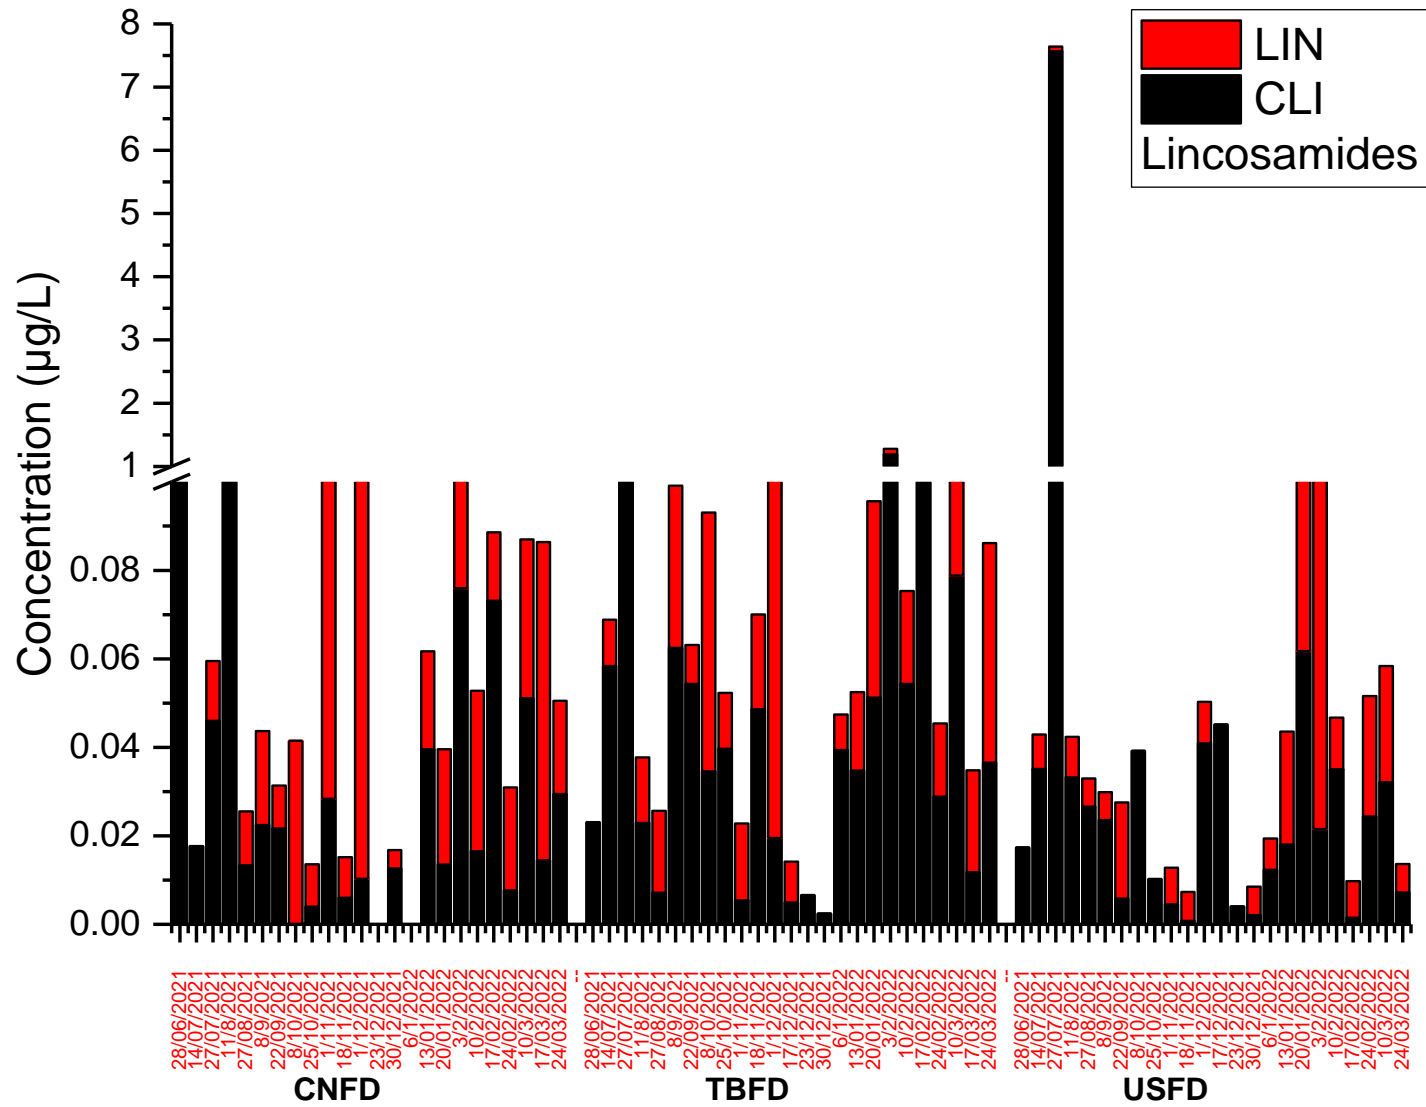

Figure S8. Variations in the concentrations of antibiotics-lincosamides

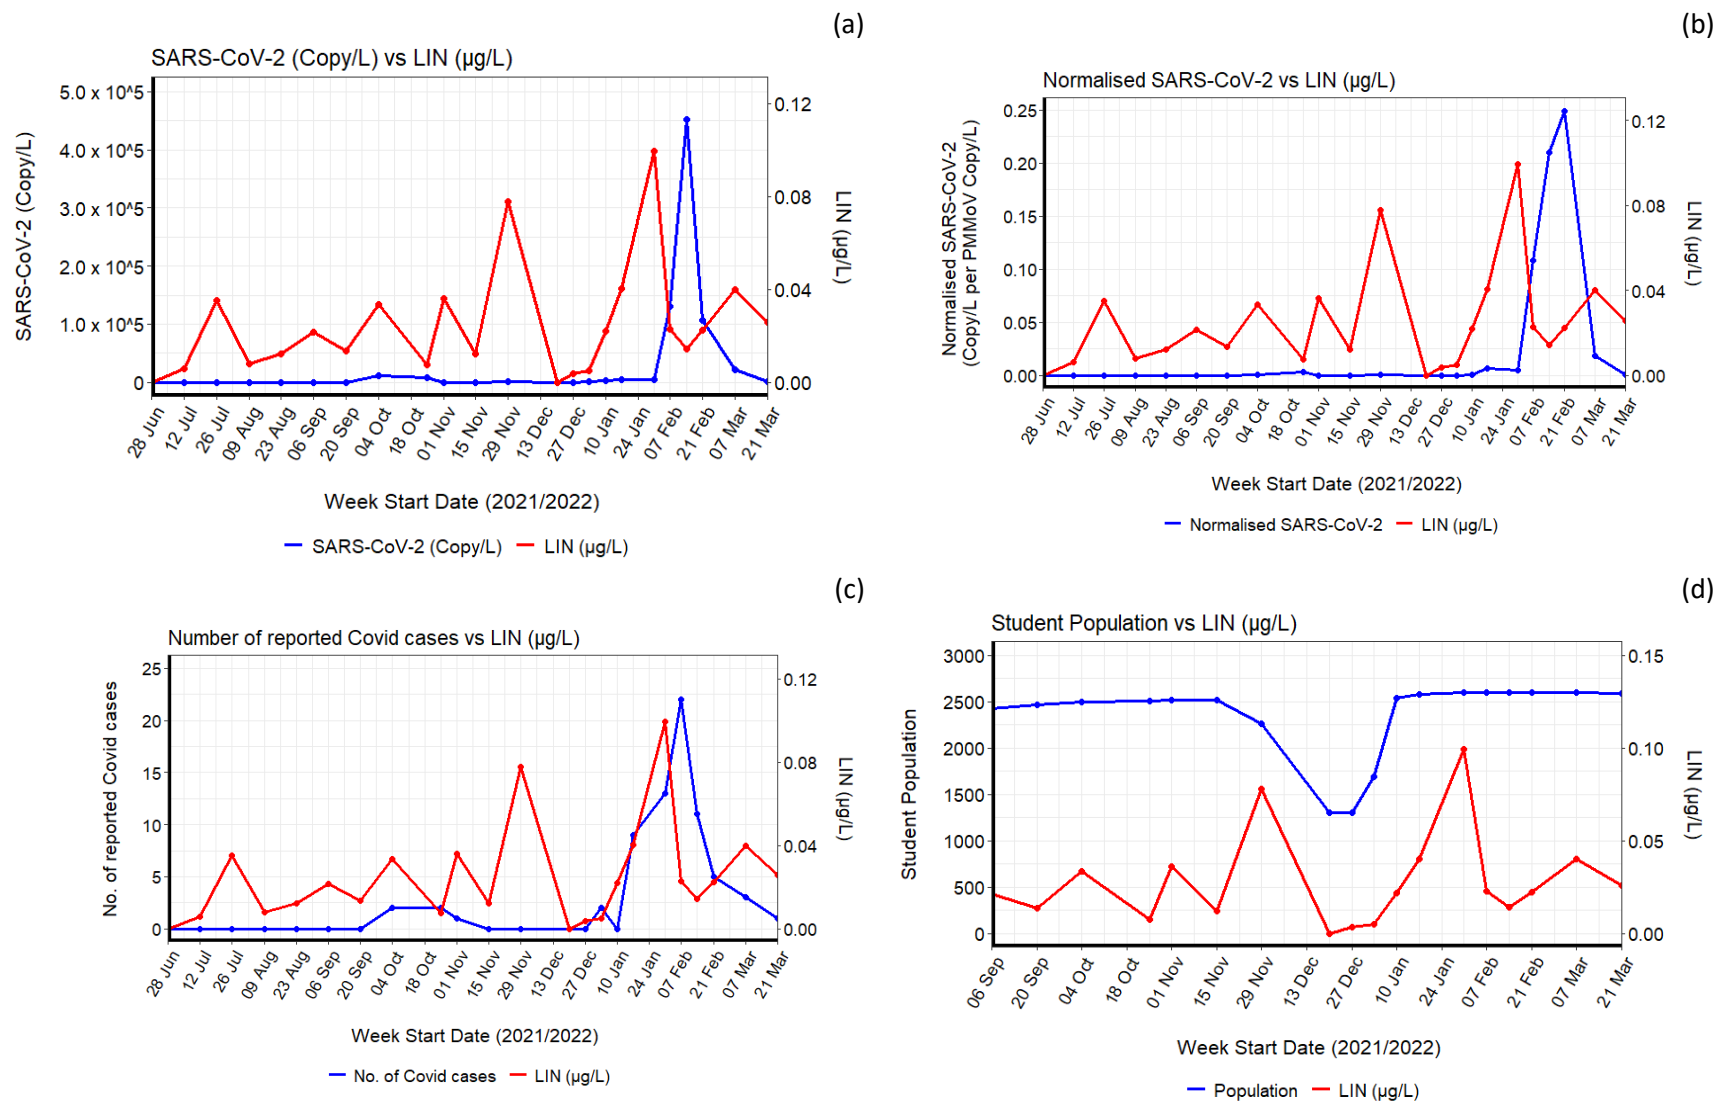

**Figure S9.** Correlation analysis between lincosamycin and (a) SARS-CoV-2 (copy/L), (b) normalized SARS-CoV-2 (Copy/L per PMMoV Copy/L), (c) number of reported COVID-19 cases, and (d) student population

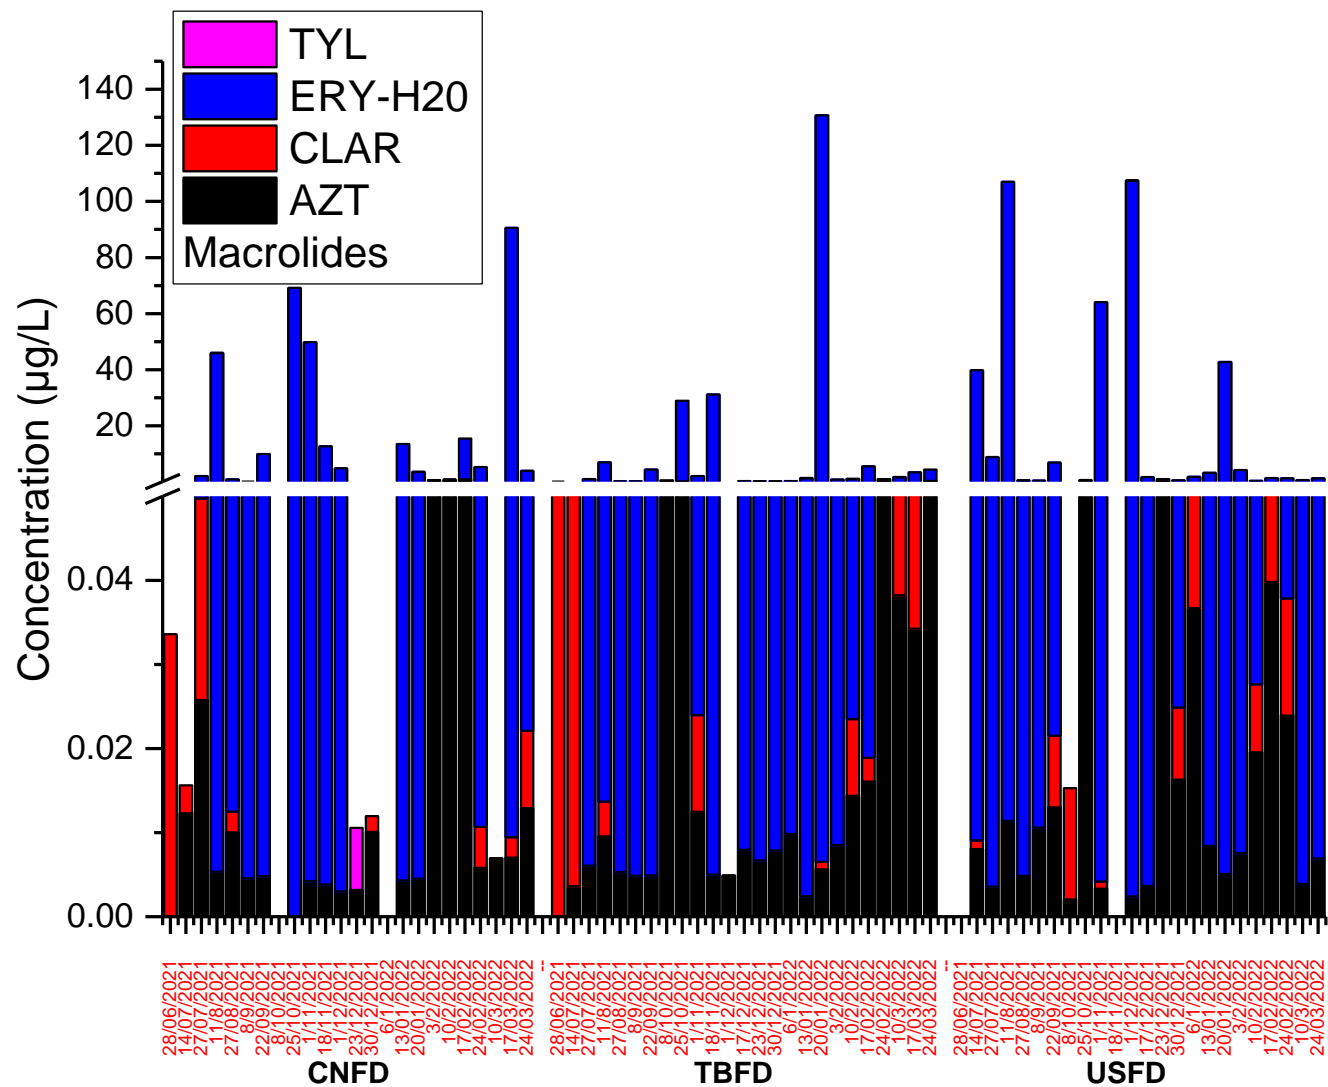

Figure S10. Variations in the concentrations of antibiotics-macrolides

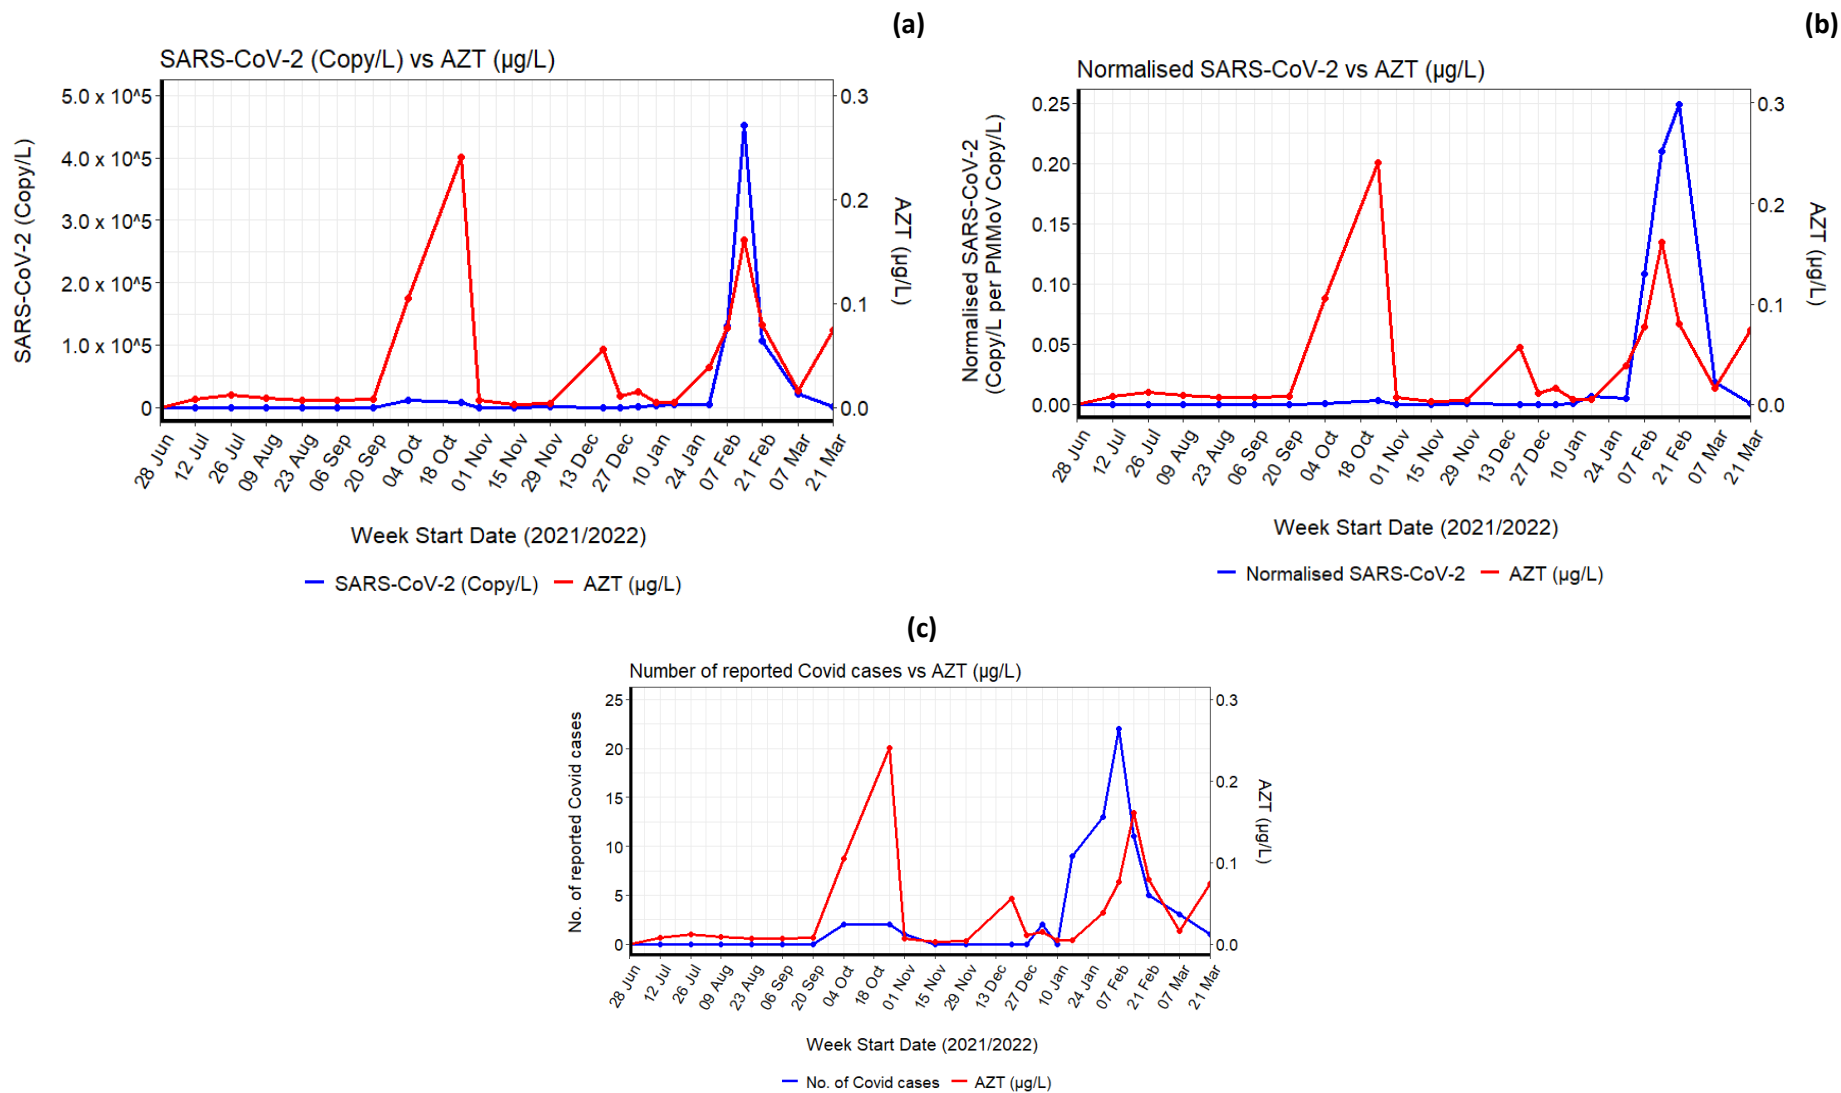

**Figure S11.** Correlation analysis between azithromycin and (a) SARS-CoV-2 (copy/L), (b) normalized SARS-CoV-2 (Copy/L per PMMoV Copy/L), and (c) number of reported COVID-19 cases



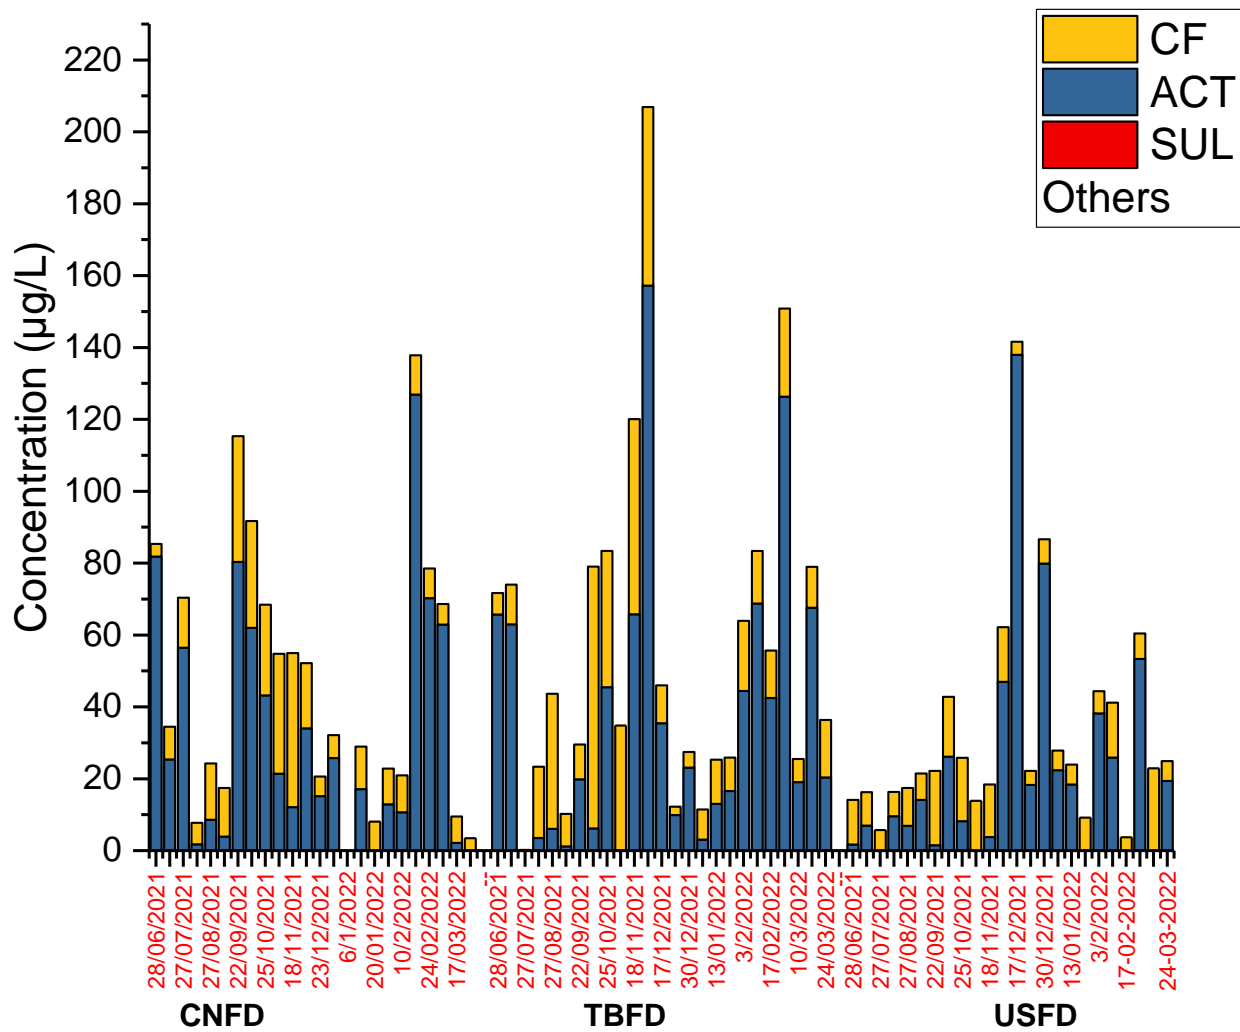

Figure S12. Variations in the concentrations of other pharmaceuticals

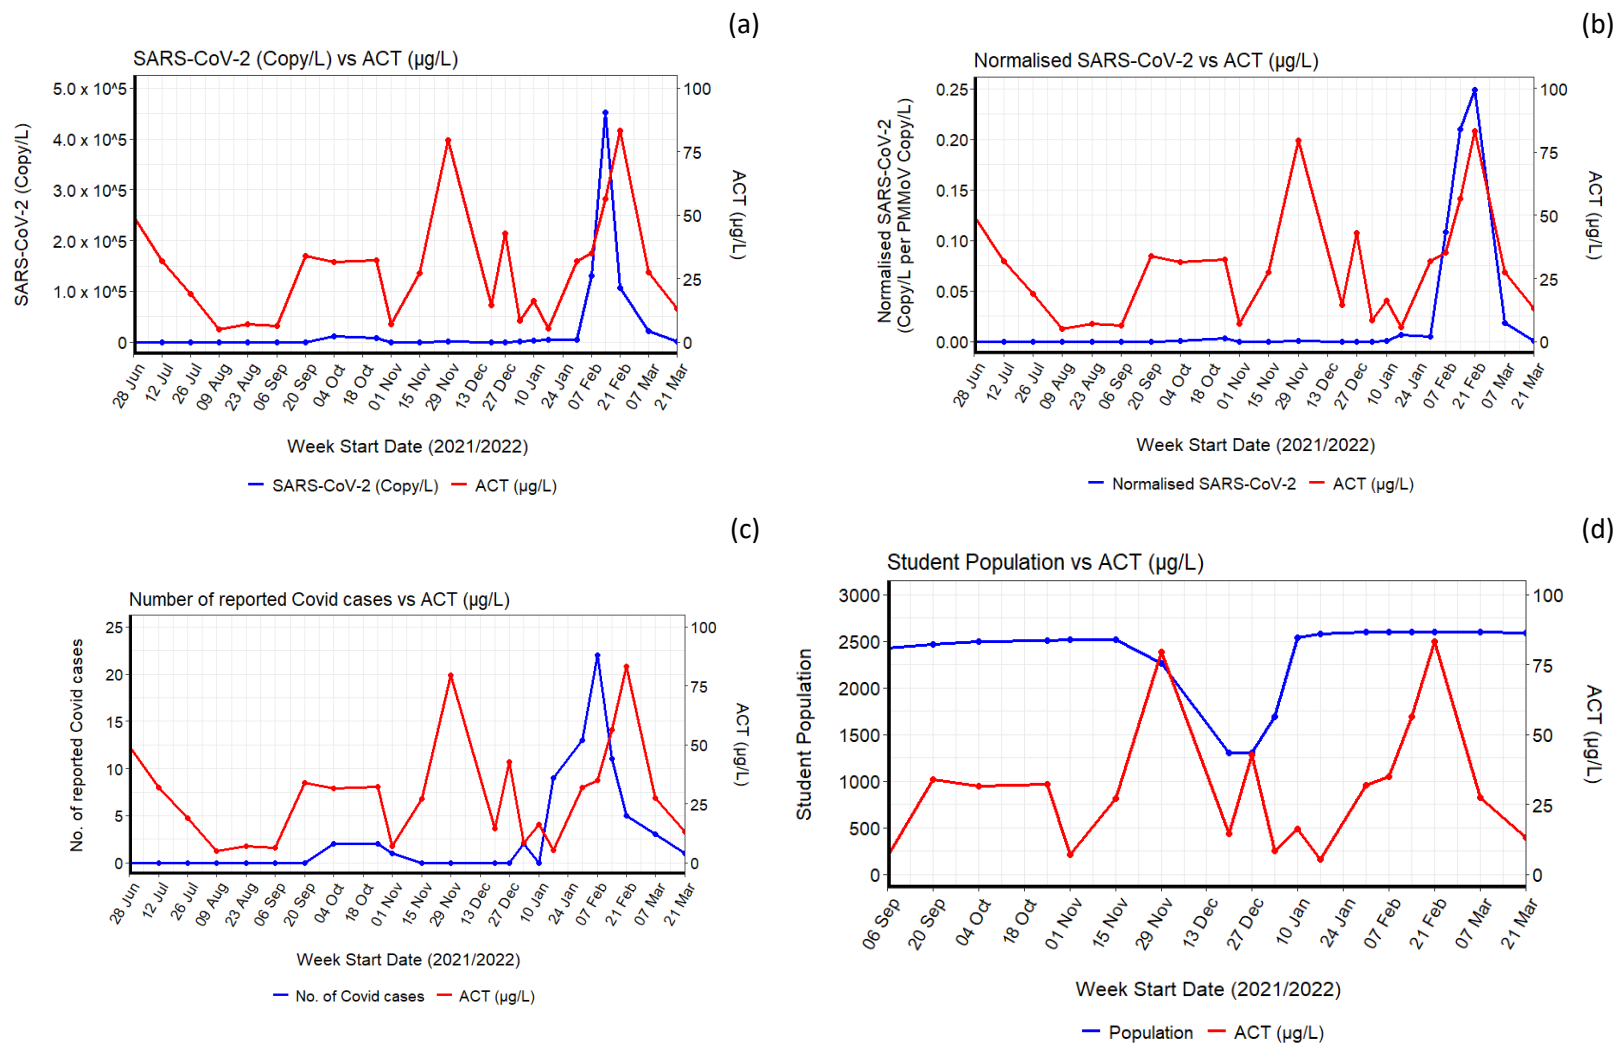

**Figure S13.** Correlation analysis between acetaminophen and (a) SARS-CoV-2 (copy/L), (b) normalized SARS-CoV-2 (Copy/L per PMMoV Copy/L), (c) number of reported COVID-19 cases, and (d) student population

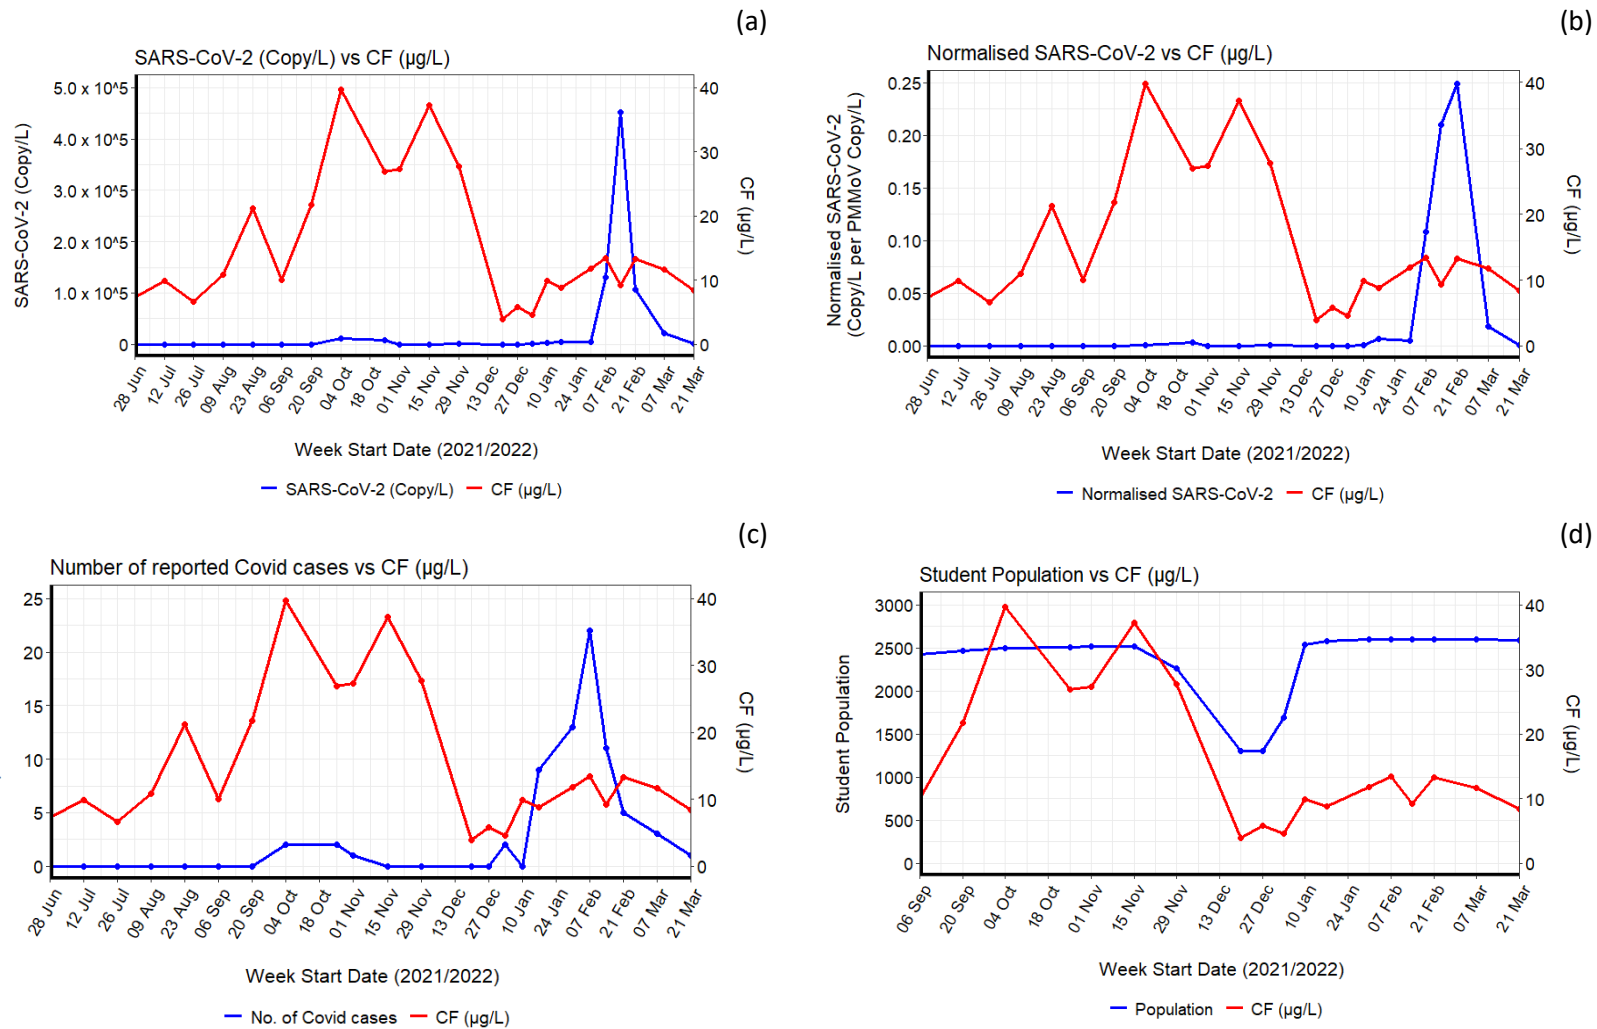

**Figure S14.** Correlation analysis between caffeine and (a) SARS-CoV-2 (copy/L), (b) normalized SARS-CoV-2 (Copy/L per PMMoV Copy/L), (c) number of reported COVID-19 cases, and (d) student population

## Correlation Analysis

The column “Variable” refers to the other variable against which the Antiviral concentration was correlated against

**Table S5: Acetaminophen correlation analysis for various conditions**

| Variable                      | SpearmanCoeff | p_valueRho |
|-------------------------------|---------------|------------|
| SARS-CoV-2<br>(Copy/L)        | 0.41          | 0.053      |
| Normalised_SARS-<br>CoV-2     | 0.38          | 0.077      |
| No. of Covid cases            | 0.19          | 0.385      |
| Covid cases per<br>Population | 0.17          | 0.435      |
| Population                    | 0.14          | 0.586      |

No statistically significant correlation

**Table S6: Caffeine correlation analysis for various conditions**

| Variable                      | SpearmanCoeff | p_valueRho |
|-------------------------------|---------------|------------|
| SARS-CoV-2<br>(Copy/L)        | 0.22          | 0.32       |
| Normalised_SARS-<br>CoV-2     | 0.15          | 0.49       |
| No. of Covid cases            | 0.12          | 0.59       |
| Covid cases per<br>Population | 0.1           | 0.66       |
| Population                    | 0.15          | 0.54       |

No statistically significant correlation
